# Supplementary material for: Exploring the unique electrical properties of metastable BiPO4through switchable phase transitions
Source: Royal Society of Chemistry journal article supplement (doi:10.1039/c2ce26168e), 2012-11-06
Supplement: c2ce26168e.pdf [file c2ce26168e.pdf]

## Support Information

Exploring the unique electrical properties of metastable  $\text{BiPO}_4$  through  
switchable phase transitions

Minglei Zhao, Liping Li, Liusai Yang, Jing Zheng and Guangshe Li\*

*State Key Laboratory of Structural Chemistry, Fujian Institute of Research on the  
Structure of Matter, Graduate School of Chinese Academy of Sciences, Fuzhou,  
350002, P. R. China.*

*Fax: +86-591-83702122; E-mail: guangshe@fjirsm.ac.cn*

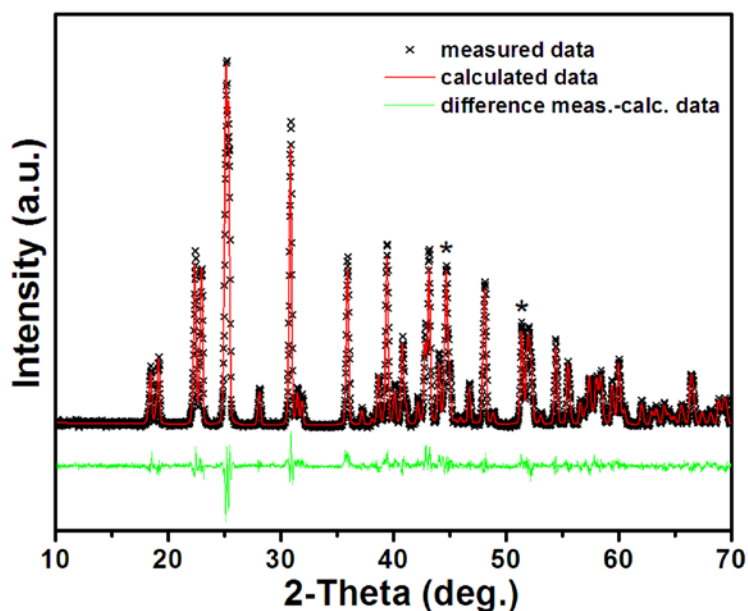

**Fig. S1** Rietveld fitting on powder X-ray diffraction data of HTMP prepared via heating treatment over HP at 900 °C for 2 h ( $R_{wp}=0.1152$ ,  $R_p=0.0868$ ,  $R_{-blnk}=0.0795$ , and  $\chi^2=2.023$ ).

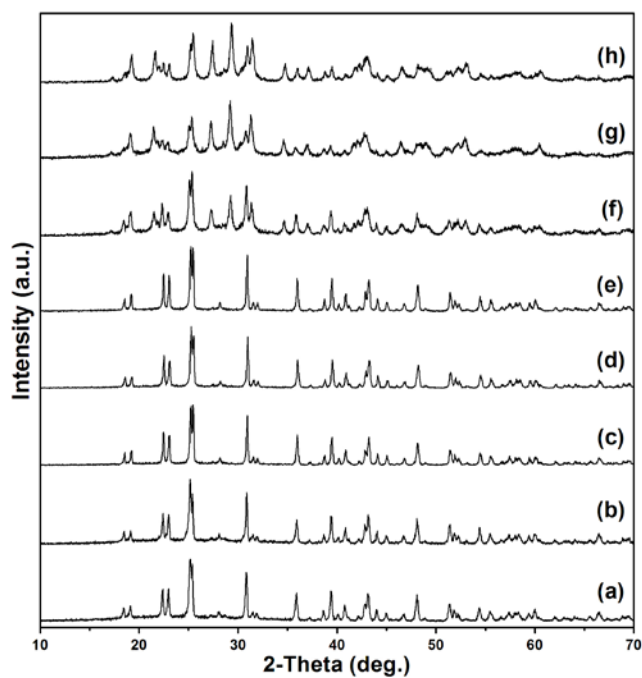

**Fig. S2** XRD patterns of (a) HTMP and the products obtained after ball milling HTMP for different time intervals at a bowl rotation speed of 60 r/min: (b) 2 min, (c) 5 min, (d) 60 min, and (e) 120 min; and at a bowl rotation speed of 180 r/min: (f) 30 min, (g) 60 min, and (h) 90 min.

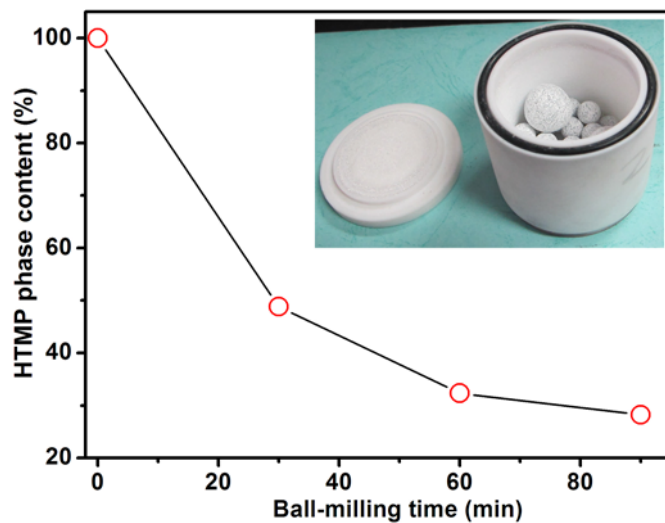

**Fig. S3** Ball-milling time dependence of phase content of HTMP. Inset shows the balls and bowl of ball-milling container.

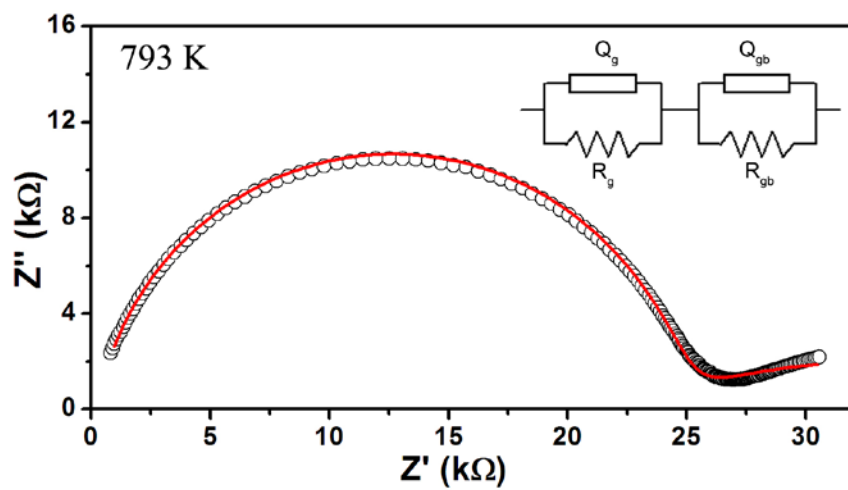

**Fig. S4** Complex impedance plots for as-prepared HTMP measured at 793 K. Solid lines are the data fit results using the equivalent circuit model illustrated in inset.

**Table S1** Lattice parameters and atomic positions for HTMP and the products LTMP obtained through hand-grinding by Rietveld refinement using GSAS program.

| Sample | Lattice parameters         | Atom | Site | x      | y       | z       |                           |
|--------|----------------------------|------|------|--------|---------|---------|---------------------------|
| HTMP   | P2 <sub>1</sub> /m(11)     | Bi   | 2e   | 0.1433 | 0.2500  | 0.1681  | R <sub>wp</sub> =0.1152   |
|        | a=6.7550(3) Å              | P    | 2e   | 0.3782 | 0.7500  | 0.3134  | R <sub>p</sub> =0.0868    |
|        | b=7.0712(2) Å              | O1   | 2e   | 0.6659 | 0.7500  | 0.2378  | R <sub>blnk</sub> =0.0795 |
|        | c=4.7060(1) Å              | O2   | 2e   | 0.6158 | 0.2500  | 0.3698  | χ <sup>2</sup> =2.023     |
|        | β=96.280(2)                | O3   | 4f   | 0.2214 | 0.5796  | 0.1808  |                           |
|        | V=161.55(1) Å <sup>3</sup> |      |      |        |         |         |                           |
| LTMP   | P2 <sub>1</sub> /n(14)     | Bi   | 4e   | 0.2871 | 0.1409  | 0.0856  | R <sub>wp</sub> =0.1168   |
|        | a=6.7600(5) Å              | P    | 4e   | 0.3038 | 0.1294  | 0.06067 | R <sub>p</sub> =0.0919    |
|        | b=6.9450(5) Å              | O1   | 4e   | 0.2767 | -0.0082 | 0.4341  | R <sub>blnk</sub> =0.0879 |
|        | c=6.4825(4) Å              | O2   | 4e   | 0.3775 | 0.3262  | 0.5336  | χ <sup>2</sup> =3.263     |
|        | β=103.700(6)               | O3   | 4e   | 0.4489 | 0.1744  | 0.8153  |                           |
|        | V=295.69(4) Å <sup>3</sup> | O4   | 4e   | 0.1112 | 0.1925  | 0.6739  |                           |
